# Supplementary material
Source: PubMed Central journal article supplement (PMC7564695)
Supplement: Supplement_material.pdf [file Supplement_material.pdf]

**Table. Univariate comparisons of Responders vs. Non-Responders at the time of discharge (N=420)**

| Variable                    |                    | Responders<br>n=211 | Non-Responders<br>n=209 | t/ $\chi^2$ | p      |
|-----------------------------|--------------------|---------------------|-------------------------|-------------|--------|
| <b>Socio-demographic</b>    |                    |                     |                         |             |        |
| Sex (male%)                 |                    | 112 (53%)           | 138 (66%)               | 7.306       | 0.01   |
| Age at assessment           |                    | 29.55<br>(10.89)    | 29.58 (10.68)           | -0.03       | 0.98   |
| Marital Status              | Single             | 126 (60%)           | 132 (63%)               | 2.31        | 0.511  |
|                             | Married            | 77 (36%)            | 66 (32%)                |             |        |
|                             | Separated/Divorced | 6 (3%)              | 10 (5%)                 |             |        |
|                             | Widowed            | 2 (1%)              | 1 (0.5%)                |             |        |
| Age at onset of OCD         |                    | 20.26 (8.73)        | 18.31 (8.26)            | 2.34        | 0.02   |
| Duration of Illness         |                    | 9.11 (6.97)         | 11.30 (8.01)            | -3.00       | 0.003  |
| <b>YBOCS Severity</b>       |                    |                     |                         |             |        |
| YBOCS (Obsession) Baseline  |                    | 15.13 (2.43)        | 15.44 (2.39)            | -1.33       | 0.19   |
| YBOCS (Compulsion) Baseline |                    | 14.46 (2.81)        | 14.88 (2.65)            | -1.56       | 0.12   |
| YBOCS (Total) Baseline      |                    | 29.62 (4.56)        | 30.27 (4.44)            | -1.49       | 0.14   |
| Avoidance Baseline          |                    | 2.17 (0.98)         | 2.21 (1.06)             | -0.4        | 0.69   |
| CGI-S at Baseline           |                    | 5.45 (0.67)         | 5.67 (0.74)             | -3.18       | 0.002  |
| Poor Insight                |                    | 18 (9%)             | 51 (24%)                | 19.26<br>4  | <0.001 |

| <b>YBOCS Checklist Items</b> |           |           |       |      |
|------------------------------|-----------|-----------|-------|------|
| Contamination Obsessions     | 120 (57%) | 139 (67%) | 4.124 | 0.04 |
| Somatic Obsessions           | 32 (15%)  | 31 (15%)  | 0.009 | 0.92 |
| Aggressive Obsessions        | 74 (35%)  | 70 (33%)  | 0.116 | 0.73 |
| Sexual Obsessions            | 58 (27%)  | 59 (28%)  | 0.029 | 0.87 |
| Religious Obsessions         | 65 (31%)  | 58 (28%)  | 0.473 | 0.49 |
| Symmetrical Obsessions       | 60 (28%)  | 67 (32%)  | 0.653 | 0.42 |
| Hoarding Obsessions          | 16 (8%)   | 26 (12%)  | 2.752 | 0.1  |
| Pathological Doubts          | 96 (45%)  | 104 (50%) | 0.765 | 0.38 |
| Miscellaneous Obsessions     | 68 (32%)  | 71 (34%)  | 0.144 | 0.7  |
| Washing Compulsions          | 122 (58%) | 139 (67%) | 3.368 | 0.07 |
| Arranging Compulsions        | 53 (25%)  | 54 (26%)  | 0.029 | 0.87 |
| Checking Compulsions         | 112 (53%) | 110 (53%) | 0.008 | 0.93 |
| Repeating Compulsions        | 88 (42%)  | 109 (52%) | 4.601 | 0.03 |
| Counting Compulsions         | 26 (12%)  | 25 (12%)  | 0.013 | 0.91 |
| Hoarding Compulsions         | 12 (6%)   | 25 (12%)  | 5.146 | 0.02 |
| Cognitive Compulsions        | 93 (44%)  | 93 (44%)  | 0.008 | 0.93 |
| Miscellaneous Compulsions    | 117 (55%) | 129 (62%) | 1.702 | 0.19 |
| Proxy Compulsions            | 91 (43%)  | 95 (45%)  | 0.230 | 0.63 |
| <b>Comorbidities</b>         |           |           |       |      |
| Major Depression Current     | 99 (47%)  | 75 (36%)  | 5.268 | 0.02 |
| Major Depression Lifetime    | 25 (16%)  | 27 (15%)  | 0.073 | 0.79 |
| Dysthymia                    | 10 (5%)   | 21 (10%)  | 4.328 | 0.05 |
| Mania/Hypomania (Lifetime)   | 14 (7%)   | 19 (9%)   | 0.875 | 0.35 |

|                                                         |     |             |             |            |       |
|---------------------------------------------------------|-----|-------------|-------------|------------|-------|
| Psychosis (Lifetime)                                    |     | 10 (5%)     | 25 (12%)    | 7.170      | 0.01  |
| Generalized Anxiety Disorder                            |     | 16 (8%)     | 11 (5%)     | 0.939      | 0.33  |
| Social Anxiety Disorder                                 |     | 16 (8%)     | 8 (4%)      | 2.748      | 0.2   |
| Panic Disorder                                          |     | 5 (2%)      | 3 (1%)      | 0.490      | 0.48  |
| Agoraphobia                                             |     | 2 (1%)      | 2 (1%)      | 0.000      | 0.99  |
| Tourette's/Tic Disorder                                 |     | 7 (3%)      | 10 (5%)     | 0.582      | 0.45  |
| Other OC-Related Disorders                              | BDD | 11 (5%)     | 6 (3%)      | 4.502      | 0.34  |
|                                                         | ORS | 0 (0%)      | 1 (0%)      |            |       |
|                                                         | SPD | 2 (1%)      | 0 (0%)      |            |       |
|                                                         | TTM | 2 (1%)      | 2 (1%)      |            |       |
| Any Axis-I Comorbidity                                  |     | 159 (75.4%) | 153 (73.2%) | 0.254      | 0.614 |
| Any Personality Disorder                                |     | 53 (25.1%)  | 67 (32.1%)  | 2.477      | 0.116 |
| <b>Prior Treatments Received</b>                        |     |             |             |            |       |
| No. of failed adequate SRI Trials                       |     | 2.46(1.08)  | 2.72 (1.46) | -<br>2.063 | 0.04  |
| SSRI Resistant (Failed 2 Adequate SSRIs)                |     | 179 (85%)   | 168 (80%)   | 1.449      | 0.23  |
| Failed Adequate Trial of Clomipramine                   |     | 82 (39%)    | 93 (44%)    | 1.372      | 0.24  |
| No. of failed Augmentation Trials                       |     | 1.08(0.95)  | 1.33 (1.09) | -<br>2.538 | 0.01  |
| Failed 2 Augmentation Trials (at least 1 Antipsychotic) |     | 60 (28%)    | 73 (35%)    | 2.045      | 0.15  |
| Failed Adequate CBT in the Past                         |     | 65 (31%)    | 66 (32%)    | 0.029      | 0.86  |

BDD – Body Dysmorphic Disorder; ORS – Olfactory Reference Syndrome; SPD – Skin Picking Disorder; TTM - Trichotillomania
